# Supplementary material for: Altered Chromatin Occupancy of Master Regulators Underlies Evolutionary Divergence in the Transcriptional Landscape of Erythroid Differentiation
Source: PubMed Central journal article supplement (PMC4270484; doi:10.1371/journal.pgen.1004890), 2014-12-18

**A****H3K4me1**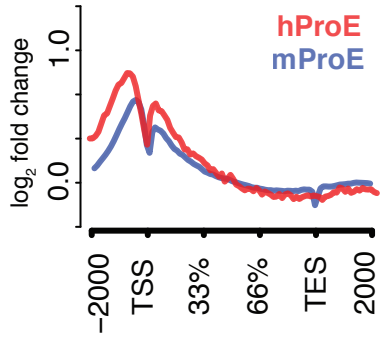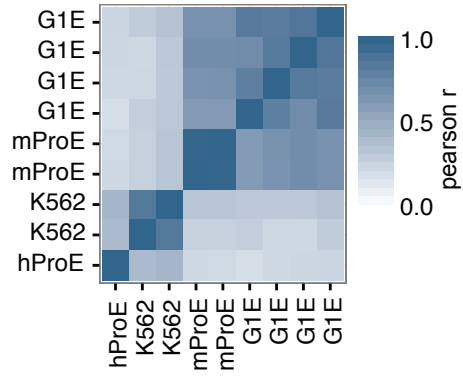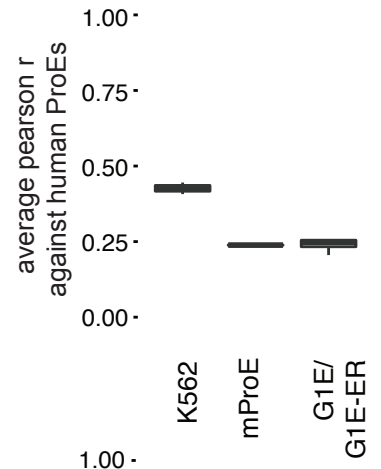**B****H3K36me3**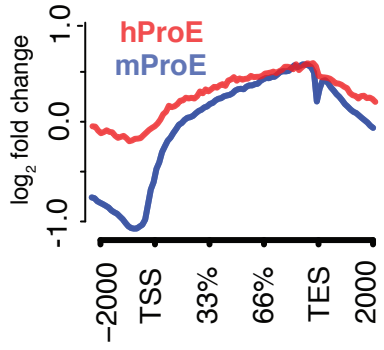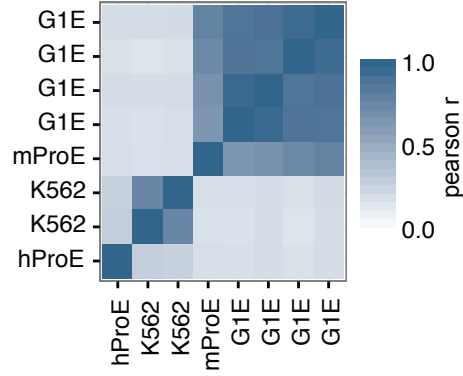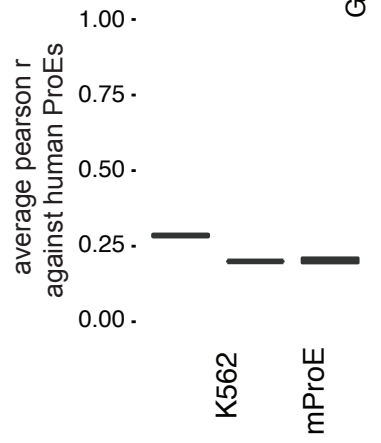

Supplement: pgen.1004890.s001.pdf [file pgen.1004890.s001.pdf]
