# Supplementary material for: Altered Chromatin Occupancy of Master Regulators Underlies Evolutionary Divergence in the Transcriptional Landscape of Erythroid Differentiation
Source: PubMed Central journal article supplement (PMC4270484; doi:10.1371/journal.pgen.1004890), 2014-12-18
Supplement: pgen.1004890.s005.pdf [file pgen.1004890.s005.pdf]

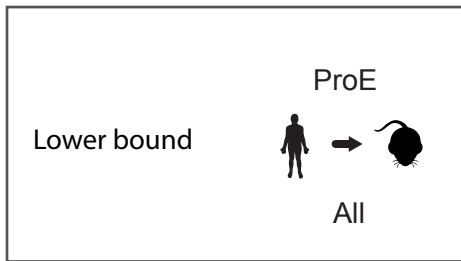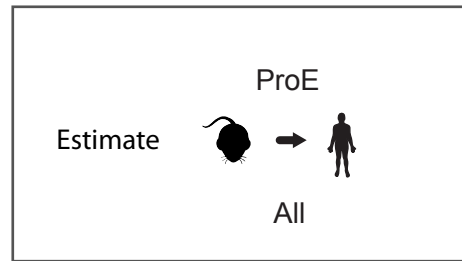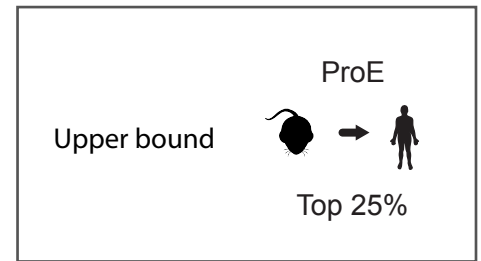

**A**

|       | conserved   |          |             | compensatory |          |             |
|-------|-------------|----------|-------------|--------------|----------|-------------|
|       | Lower bound | Estimate | Upper bound | Lower bound  | Estimate | Upper bound |
| GATA1 | 4.9%        | 25.5%    | 36.9%       | 11.8%        | 48.9%    | 58.0%       |
| TAL1  | 6.6%        | 21.7%    | 40.7%       | 11.6%        | 33.7%    | 50.2%       |
| KLF1  | 22.2%       | 60.4%    | 82.1%       | 26.1%        | 78.2%    | 92.0%       |
| NFE2  | 7.5%        | 19.6%    | 43.7%       | 18.5%        | 37.3%    | 64.2%       |

**B**

|       | conserved   |          |             | compensatory |          |             |
|-------|-------------|----------|-------------|--------------|----------|-------------|
|       | Lower bound | Estimate | Upper bound | Lower bound  | Estimate | Upper bound |
| GATA1 | 1483        | 1747     | 669         | 3683         | 3216     | 1052        |
| TAL1  | 711         | 730      | 382         | 1246         | 1135     | 471         |
| KLF1  | 7616        | 7184     | 2541        | 12132        | 9302     | 2849        |
| NFE2  | 2194        | 2079     | 1129        | 6586         | 3958     | 1659        |
