# Supplementary material for: Altered Chromatin Occupancy of Master Regulators Underlies Evolutionary Divergence in the Transcriptional Landscape of Erythroid Differentiation
Source: PubMed Central journal article supplement (PMC4270484; doi:10.1371/journal.pgen.1004890), 2014-12-18

**A**

ProE

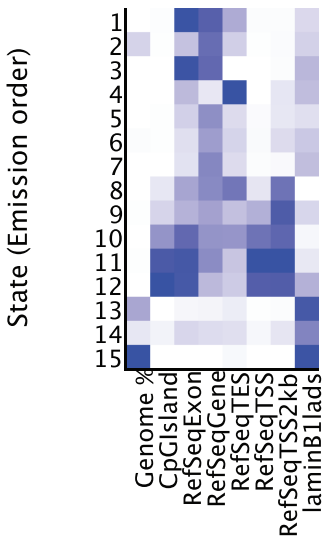

**B**

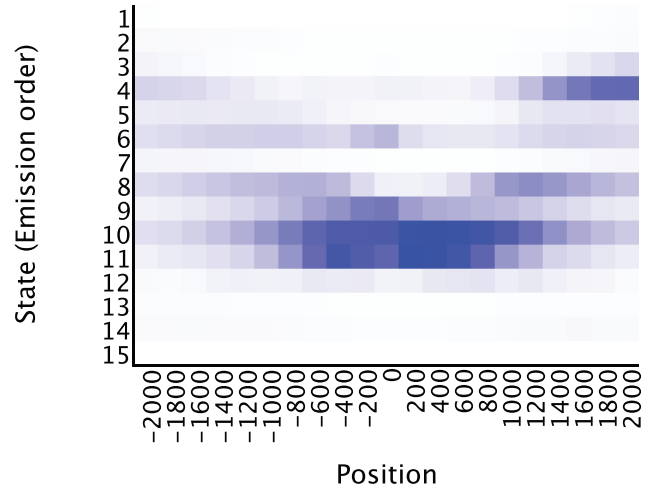

**C**

K562

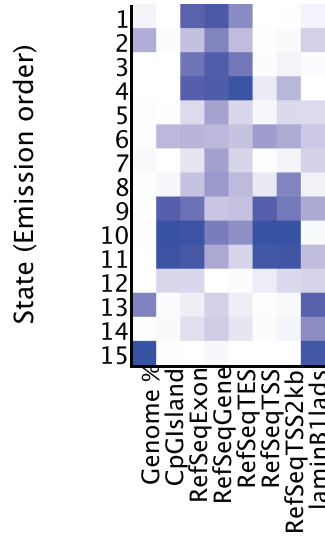

**D**

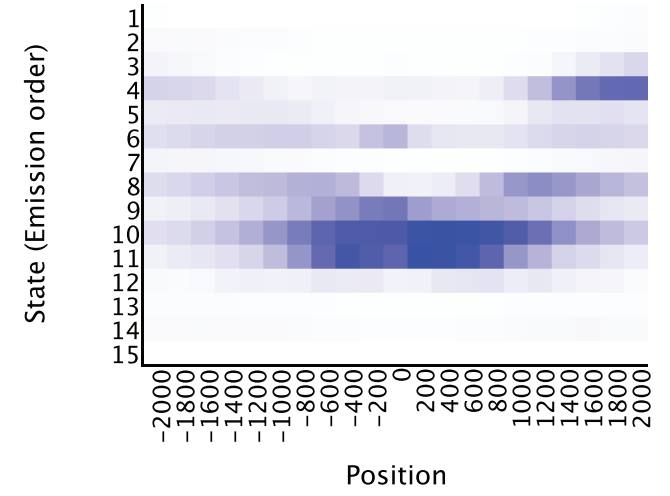

**E**

ProE

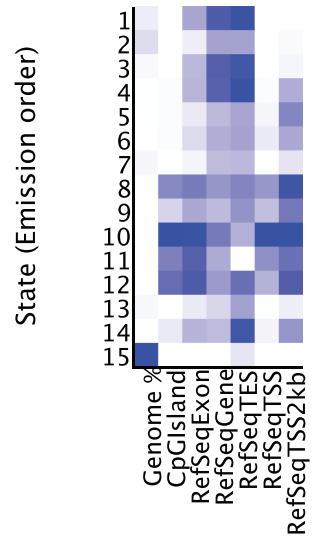

**F**

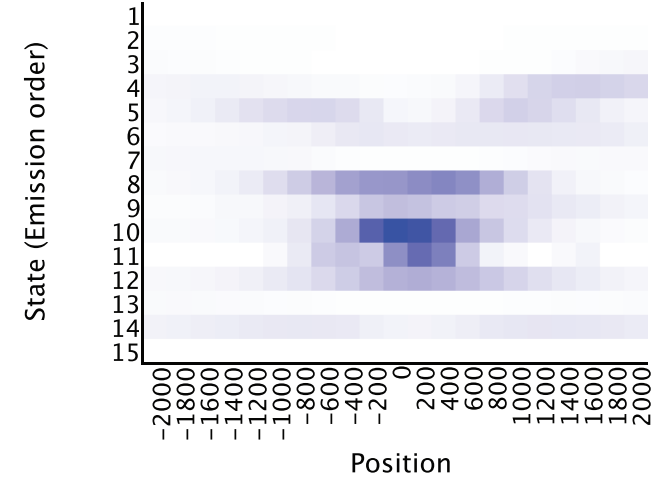

Supplement: pgen.1004890.s008.pdf [file pgen.1004890.s008.pdf]
