# Supplementary material for: Altered Chromatin Occupancy of Master Regulators Underlies Evolutionary Divergence in the Transcriptional Landscape of Erythroid Differentiation
Source: PubMed Central journal article supplement (PMC4270484; doi:10.1371/journal.pgen.1004890), 2014-12-18
Supplement: pgen.1004890.s016.pdf [file pgen.1004890.s016.pdf]

|                 | Mouse    |        | Human    |      |
|-----------------|----------|--------|----------|------|
|                 | ProE     | G1E    | ProE     | K562 |
| <b>GATA1</b>    | 2,3,4,10 | 4,8,10 | 1,6,9,13 | 9,11 |
| <b>TAL1</b>     | 4,10     | 4,10   | 1,6,13   | 9    |
| <b>KLF1</b>     | 5        |        | 6        | 9    |
| <b>NFE2</b>     | 2        |        | 6        | 9    |
| <b>H3K4me3</b>  | 4,12     | 4,10   | 6        | 9    |
| <b>H3K27me3</b> | 4,12     | 4,10   | 1        | 9    |
| <b>H3K4me1</b>  | 4        | 4      | 7        | 9    |
| <b>H3K4me2</b>  | 12       |        | 7        | 9    |
| <b>H3K36me3</b> | 12       | 4      | 7        | 9    |
| <b>H3K9ac</b>   | 12       |        | 7        | 9    |

| #  | Citation                           | GEO ID   |
|----|------------------------------------|----------|
| 1  | Pinello et al, PNAS 2014           | GSE52924 |
| 2  | Hughes et al, Nature Genetics 2014 | GSE47492 |
| 3  | May et al, Cell Stem Cell 2013     | GSE50406 |
| 4  | Mouse ENCODE                       | GSE36028 |
| 5  | Pilon et al, Blood 2011            | GSE48020 |
| 6  | Su et al, J Biol Chem 2013         | GSE43626 |
| 7  | Xu et al., Dev Cell 2012           | GSE36985 |
| 8  | Kadauke et al., Cell 2012          | GSE36589 |
| 9  | ENCODE                             | GSE31477 |
| 10 | Wu et al., Genome Research 2011    | GSE30142 |
| 11 | Fujiwara et al., Mol Cell 2009     | GSE18868 |
| 12 | Wong et al., Blood 2011            | GSE27893 |
| 13 | Hu et al., Genome Research 2011    | GSE26501 |
