# Supplementary material for: Altered Chromatin Occupancy of Master Regulators Underlies Evolutionary Divergence in the Transcriptional Landscape of Erythroid Differentiation
Source: PubMed Central journal article supplement (PMC4270484; doi:10.1371/journal.pgen.1004890), 2014-12-18
Supplement: pgen.1004890.s017.pdf [file pgen.1004890.s017.pdf]

| Identifier   | Cell type | Factor   | Replicate     | Raw reads | Aligned reads | Number of peaks* |
|--------------|-----------|----------|---------------|-----------|---------------|------------------|
| ENCODE       | K562      | GATA1    | Rep 1         | 7855375   | 5628646       | 24578            |
| ENCODE       | K562      | GATA1    | Rep 2         | 12668283  | 10330308      |                  |
| GSE18868     | K562      | GATA1    | Rep 1         | 1478403   | 868302        |                  |
| GSE18868     | K562      | GATA1    | Rep 2         | 12668283  | 10330308      |                  |
| GSE18868     | K562      | GATA1    | Rep 3         | 2307595   | 1671964       |                  |
| GSE18868     | K562      | GATA1    | Rep 4         | 4069377   | 3088380       |                  |
| ENCODE       | K562      | TAL1     | Rep 1         | 32146960  | 26541327      | 25309            |
| ENCODE       | K562      | TAL1     | Rep 2         | 21844596  | 17764539      |                  |
| ENCODE       | K562      | NFE2     | Rep 1         | 6808336   | 5359885       | 6008             |
| ENCODE       | K562      | NFE2     | Rep 2         | 6395318   | 5099213       |                  |
| GSE26320     | K562      | H3K4me1  | Rep 1         | 17848560  | 8157362       | 6319250          |
| GSE26320     | K562      | H3K4me1  | Rep 2         | 18105919  | 6319250       |                  |
| GSE26320     | K562      | H3K4me2  | Rep 1         | 16027507  | 11235270      | 6319250          |
| GSE26320     | K562      | H3K4me2  | Rep 2         | 18105919  | 6319250       |                  |
| ENCODE       | K562      | H3K4me3  | Rep 1         | 14782249  | 7239860       | 14033165         |
| ENCODE       | K562      | H3K4me3  | Rep 2         | 25272278  | 14033165      |                  |
| ENCODE       | K562      | H3K27me3 | Rep 1         | 19297190  | 10247229      | 10515543         |
| ENCODE       | K562      | H3K27me3 | Rep 2         | 22830589  | 10515543      |                  |
| GSE26320     | K562      | H3K36me3 | Rep 1         | 26973698  | 12064926      | 8931276          |
| GSE26320     | K562      | H3K36me3 | Rep 2         | 17501267  | 8931276       |                  |
| GSE26320     | K562      | H3K9ac   | Rep 1         | 23461826  | 13425993      | 2960101          |
| GSE26320     | K562      | H3K9ac   | Rep 2, Read 1 | 11105594  | 2960101       |                  |
| GSE26320     | K562      | H3K9ac   | Rep 2, Read 2 | 13453306  | 6998259       |                  |
| ENCODE       | hProE     | GATA1    | Rep 1         | 20358537  | 15052483      | 50543            |
| ENCODE       | hProE     | GATA1    | Rep 1         | 22918252  | 13389066      |                  |
| GSE26501     | hProE     | GATA1    | Rep 1         | 18201969  | 14557864      |                  |
| GSE52924     | hProE     | GATA1    | Rep 1         | 125754149 | 103668057     |                  |
| GSE43626     | hProE     | GATA1    | Rep 1         | 27642243  | 23331425      |                  |
| GSE26501     | hProE     | TAL1     | Rep 1         | 15373663  | 11695167      |                  |
| GSE52924     | hProE     | TAL1     | Rep 1         | 129960043 | 83604587      | 17827            |
| GSE43626     | hProE     | KLF1     | Rep 1         | 31419057  | 27162194      | 48429            |
| GSE43626     | hProE     | NFE2     | Rep 1         | 26992380  | 23170446      | 42435            |
| GSE36985     | hProE     | H3K4me1  | Rep 1         | 8691775   | 2315420       | 3388775          |
| GSE36985     | hProE     | H3K4me2  | Rep 1         | 10990840  | 3388775       |                  |
| GSE43626     | hProE     | H3K4me3  | Rep 1         | 28380798  | 22727258      | 143818225        |
| GSE52924     | hProE     | H3K27me3 | Rep 1         | 155656072 | 143818225     |                  |
| GSE36985     | hProE     | H3K36me3 | Rep 1         | 6421505   | 2576254       | 4695040          |
| GSE36985     | hProE     | H3K9ac   | Rep 1         | 14048449  | 4695040       |                  |
| GSE30142     | G1E       | TAL1     | Rep 2         | 24252830  | 19778393      | 11574453         |
| Mouse ENCODE | G1E       | TAL1     | Rep 1         | 14965148  | 11574453      |                  |
| Mouse ENCODE | G1E       | TAL1     | Rep 2         | 24252830  | 19778393      | 30203973         |
| Mouse ENCODE | G1E       | H3K4me1  | Rep 1         | 34088173  | 30203973      |                  |
| Mouse ENCODE | G1E       | H3K4me1  | Rep 2         | 49615724  | 42092797      | 15687368         |
| GSE30142     | G1E       | H3K4me3  | Rep 1, Read 1 | 17566489  | 15687368      |                  |
| GSE30142     | G1E       | H3K4me3  | Rep 1, Read 2 | 17767708  | 15868604      | 73827183         |
| GSE30142     | G1E       | H3K4me3  | Rep 2         | 95699196  | 73827183      |                  |
| GSE30142     | G1E       | H3K27me3 | Rep 1, Read 1 | 11128155  | 8417401       | 8504046          |
| GSE30142     | G1E       | H3K27me3 | Rep 1, Read 2 | 11195913  | 8504046       |                  |
| GSE30142     | G1E       | H3K27me3 | Rep 2         | 16593566  | 14331684      | 104048347        |
| Mouse ENCODE | G1E       | H3K36me3 | Rep 1         | 116403361 | 104048347     |                  |
| Mouse ENCODE | G1E       | H3K36me3 | Rep 2         | 86998117  | 76296872      | 30056277         |
| Mouse ENCODE | G1E-ER    | GATA1    | Rep 1         | 36627078  | 30056277      |                  |
| Mouse ENCODE | G1E-ER    | GATA1    | Rep 2         | 125843327 | 93523439      | 26059529         |
| Mouse ENCODE | G1E-ER    | GATA1    | Rep 3         | 33124216  | 26059529      |                  |
| Mouse ENCODE | G1E-ER    | GATA1    | Rep 4         | 120431030 | 94419653      | 26059529         |
| GSE36589     | G1E-ER    | GATA1    | Rep 1         | 33124216  | 26059529      |                  |
| GSE30142     | G1E-ER    | GATA1    | Rep 1         | 120431030 | 94419653      | 2016973          |
| GSE30142     | G1E-ER    | TAL1     | Rep 1, Read 1 | 6009741   | 2016973       |                  |
| GSE30142     | G1E-ER    | TAL1     | Rep 1, Read 2 | 8551081   | 2547387       | 2867385          |
| GSE30142     | G1E-ER    | TAL1     | Rep 1, Read 3 | 9358292   | 2867385       |                  |
| GSE30142     | G1E-ER    | TAL1     | Rep 2         | 11280758  | 9175665       | 7431745          |
| Mouse ENCODE | G1E-ER    | TAL1     | Rep 1         | 23919114  | 7431745       |                  |
| Mouse ENCODE | G1E-ER    | TAL1     | Rep 2         | 11280758  | 9175665       | 22108130         |
| Mouse ENCODE | G1E-ER    | H3K4me1  | Rep 1         | 24839073  | 22108130      |                  |
| Mouse ENCODE | G1E-ER    | H3K4me1  | Rep 2         | 115103341 | 95437238      |                  |

|              |        |          |               |           |          |       |
|--------------|--------|----------|---------------|-----------|----------|-------|
| GSE30142     | G1E-ER | H3K4me3  | Rep 1         | 11447979  | 9999421  |       |
| GSE30142     | G1E-ER | H3K4me3  | Rep 2         | 103282886 | 78798006 |       |
| GSE30142     | G1E-ER | H3K27me3 | Rep 1, Read 1 | 9280578   | 7304020  |       |
| GSE30142     | G1E-ER | H3K27me3 | Rep 1, Read 2 | 12701110  | 9849294  |       |
| GSE30142     | G1E-ER | H3K27me3 | Rep 2         | 115996679 | 96939539 |       |
| Mouse ENCODE | G1E-ER | H3K36me3 | Rep 1         | 95902219  | 86896610 |       |
| Mouse ENCODE | G1E-ER | H3K36me3 | Rep 2         | 100910289 | 86401428 |       |
| GSE50406     | mProE  | GATA1    | Rep 1         | 25021545  | 19847097 |       |
| GSE30142     | mProE  | GATA1    | Rep 1         | 37667511  | 28933586 | 10035 |
| GSE30142     | mProE  | GATA1    | Rep 2         | 91981872  | 68232667 |       |
| GSE47492     | mProE  | GATA1    | Rep 1         | 37251582  | 16215040 |       |
| GSE30142     | mProE  | TAL1     | Rep 1         | 37247380  | 30722965 |       |
| GSE30142     | mProE  | TAL1     | Rep 2         | 119633592 | 85201789 |       |
| Mouse ENCODE | mProE  | TAL1     | Rep 1         | 28646     | 23780    | 5187  |
| Mouse ENCODE | mProE  | TAL1     | Rep 2         | 2349774   | 1673228  |       |
| Mouse ENCODE | mProE  | TAL1     | Rep 3         | 20418391  | 15956785 |       |
| GSE48020     | mProE  | KLF1     | Rep 1         | 17941425  | 12568777 | 13496 |
| GSE48020     | mProE  | KLF1     | Rep 2         | 17167234  | 12536688 |       |
| GSE47492     | mProE  | NFE2     | Rep 1         | 36111826  | 17851636 | 23445 |
| Mouse ENCODE | mProE  | H3K4me1  | Rep 1         | 90552604  | 76730939 |       |
| Mouse ENCODE | mProE  | H3K4me1  | Rep 2         | 106280129 | 91773476 |       |
| GSE27893     | mProE  | H3K4me2  | Rep 1         | 19404356  | 12292023 |       |
| GSE27893     | mProE  | H3K4me3  | Rep 2         | 3065525   | 2684815  |       |
| GSE27893     | mProE  | H3K27me3 | Rep 1         | 3584413   | 2999528  |       |
| Mouse ENCODE | mProE  | H3K36me3 | Rep 1         | 91149357  | 77249035 |       |
| Mouse ENCODE | mProE  | H3K36me3 | Rep 2         | 103228393 | 91410435 |       |
| GSE27893     | mProE  | H3K36me3 | Rep 1         | 21214582  | 5042176  |       |
| GSE27893     | mProE  | H3K9ac   | Rep 1         | 2629538   | 2083420  |       |

\*Peaks were determined by pooling all replicates
