# Supplementary material for: Altered Chromatin Occupancy of Master Regulators Underlies Evolutionary Divergence in the Transcriptional Landscape of Erythroid Differentiation
Source: PubMed Central journal article supplement (PMC4270484; doi:10.1371/journal.pgen.1004890), 2014-12-18
Supplement: pgen.1004890.s018.pdf [file pgen.1004890.s018.pdf]

| H3K4me1 | hProE_1    | K562_1     | K562_2     | mProE_1    | mProE_2    | G1E_1      | G1E_2      | G1E_3      | G1E_4      |
|---------|------------|------------|------------|------------|------------|------------|------------|------------|------------|
| hProE_1 | 1          | 0.44538032 | 0.40720437 | 0.23993175 | 0.23690307 | 0.25757421 | 0.25362134 | 0.20543981 | 0.24222975 |
| K562_1  | 0.44538032 | 1          | 0.86488142 | 0.34648703 | 0.34508533 | 0.3612124  | 0.32956468 | 0.325552   | 0.32297527 |
| K562_2  | 0.40720437 | 0.86488142 | 1          | 0.275412   | 0.27548324 | 0.3028167  | 0.24011791 | 0.29379891 | 0.2464952  |
| mProE_1 | 0.23993175 | 0.34648703 | 0.275412   | 1          | 0.98159754 | 0.68774257 | 0.714893   | 0.61645171 | 0.66352365 |
| mProE_2 | 0.23690307 | 0.34508533 | 0.27548324 | 0.98159754 | 1          | 0.6878775  | 0.71667748 | 0.61762315 | 0.67769711 |
| G1E_1   | 0.25757421 | 0.3612124  | 0.3028167  | 0.68774257 | 0.6878775  | 1          | 0.88147623 | 0.8476441  | 0.82750288 |
| G1E_2   | 0.25362134 | 0.32956468 | 0.24011791 | 0.714893   | 0.71667748 | 0.88147623 | 1          | 0.72047177 | 0.8528431  |
| G1E_3   | 0.20543981 | 0.325552   | 0.29379891 | 0.61645171 | 0.61762315 | 0.8476441  | 0.72047177 | 1          | 0.81583382 |
| G1E_4   | 0.24222975 | 0.32297527 | 0.2464952  | 0.66352365 | 0.67769711 | 0.82750288 | 0.8528431  | 0.81583382 | 1          |

| H3K4me2 | hProE_1    | K562_1     | K562_2     | mProE_1    |
|---------|------------|------------|------------|------------|
| hProE_1 | 1          | 0.62812231 | 0.62505586 | 0.58966148 |
| K562_1  | 0.62812231 | 1          | 0.90460885 | 0.75327777 |
| K562_2  | 0.62505586 | 0.90460885 | 1          | 0.66748603 |
| mProE_1 | 0.58966148 | 0.75327777 | 0.66748603 | 1          |

| H3K4me3 | hProE_1    | hProE_2    | K562_1     | K562_2     | mProE_1    | G1E_1      | G1E_2      | G1E_3      | G1E_4      |
|---------|------------|------------|------------|------------|------------|------------|------------|------------|------------|
| hProE_1 | 1          | 0.88517291 | 0.87349669 | 0.88157575 | 0.79801321 | 0.78375024 | 0.75347635 | 0.77069668 | 0.77562164 |
| hProE_2 | 0.88517291 | 1          | 0.79873598 | 0.80693663 | 0.79581235 | 0.76557693 | 0.76296142 | 0.77050473 | 0.76908548 |
| K562_1  | 0.87349669 | 0.79873598 | 1          | 0.98214396 | 0.76175205 | 0.74661901 | 0.70422534 | 0.71994355 | 0.72823252 |
| K562_2  | 0.88157575 | 0.80693663 | 0.98214396 | 1          | 0.7722681  | 0.75531373 | 0.71740366 | 0.73056185 | 0.74034591 |
| mProE_1 | 0.79801321 | 0.79581235 | 0.76175205 | 0.7722681  | 1          | 0.91835676 | 0.9107748  | 0.9179498  | 0.91929749 |
| G1E_1   | 0.78375024 | 0.76557693 | 0.74661901 | 0.75531373 | 0.91835676 | 1          | 0.94619169 | 0.97955154 | 0.96404341 |
| G1E_2   | 0.75347635 | 0.76296142 | 0.70422534 | 0.71740366 | 0.9107748  | 0.94619169 | 1          | 0.95459533 | 0.97301623 |
| G1E_3   | 0.77069668 | 0.77050473 | 0.71994355 | 0.73056185 | 0.9179498  | 0.97955154 | 0.95459533 | 1          | 0.97973358 |
| G1E_4   | 0.77562164 | 0.76908548 | 0.72823252 | 0.74034591 | 0.91929749 | 0.96404341 | 0.97301623 | 0.97973358 | 1          |

| H3K9ac  | hProE_1    | K562_1     | K562_2     | mProE_1    |
|---------|------------|------------|------------|------------|
| hProE_1 | 1          | 0.85835736 | 0.78312696 | 0.74960017 |
| K562_1  | 0.85835736 | 1          | 0.93651642 | 0.72780375 |
| K562_2  | 0.78312696 | 0.93651642 | 1          | 0.67336663 |
| mProE_1 | 0.74960017 | 0.72780375 | 0.67336663 | 1          |

| H3K27me3 | hProE_1    | hProE_2    | K562_1     | K562_2     | mProE_1    | G1E_1      | G1E_2      | G1E_3      | G1E_4      |
|----------|------------|------------|------------|------------|------------|------------|------------|------------|------------|
| hProE_1  | 1          | 0.93217832 | 0.46601432 | 0.41414412 | 0.65833608 | 0.22978987 | 0.26543957 | 0.4050342  | 0.26858767 |
| hProE_2  | 0.93217832 | 1          | 0.44367328 | 0.43333257 | 0.68602864 | 0.24241656 | 0.29121533 | 0.44244692 | 0.2954955  |
| K562_1   | 0.46601432 | 0.44367328 | 1          | 0.68822483 | 0.29110313 | 0.29251776 | 0.30097259 | 0.26532314 | 0.27318735 |
| K562_2   | 0.41414412 | 0.43333257 | 0.68822483 | 1          | 0.29224406 | 0.26455464 | 0.29544629 | 0.28437543 | 0.26970712 |
| mProE_1  | 0.65833608 | 0.68602864 | 0.29110313 | 0.29224406 | 1          | 0.30244662 | 0.35508981 | 0.58333289 | 0.37673526 |
| G1E_1    | 0.22978987 | 0.24241656 | 0.29251776 | 0.26455464 | 0.30244662 | 1          | 0.90969619 | 0.70118918 | 0.82464884 |
| G1E_2    | 0.26543957 | 0.29121533 | 0.30097259 | 0.29544629 | 0.35508981 | 0.90969619 | 1          | 0.7870802  | 0.87009417 |
| G1E_3    | 0.4050342  | 0.44244692 | 0.26532314 | 0.28437543 | 0.58333289 | 0.70118918 | 0.7870802  | 1          | 0.86166076 |
| G1E_4    | 0.26858767 | 0.2954955  | 0.27318735 | 0.26970712 | 0.37673526 | 0.82464884 | 0.87009417 | 0.86166076 | 1          |

| H3K36me3 | hProE_1    | K562_1     | K562_2     | mProE_1    | G1E_1      | G1E_2      | G1E_3      | G1E_4      |
|----------|------------|------------|------------|------------|------------|------------|------------|------------|
| hProE_1  | 1          | 0.27701569 | 0.29362228 | 0.19971101 | 0.21122358 | 0.19543912 | 0.21187062 | 0.19145014 |
| K562_1   | 0.27701569 | 1          | 0.7683953  | 0.19829812 | 0.21186443 | 0.20081486 | 0.2181758  | 0.19241206 |
| K562_2   | 0.29362228 | 0.7683953  | 1          | 0.18958665 | 0.20590441 | 0.18634527 | 0.20996608 | 0.17449626 |
| mProE_1  | 0.19971101 | 0.19829812 | 0.18958665 | 1          | 0.67431202 | 0.65316545 | 0.78818393 | 0.73931716 |
| G1E_1    | 0.21122358 | 0.21186443 | 0.20590441 | 0.67431202 | 1          | 0.95478493 | 0.90579486 | 0.88411235 |
| G1E_2    | 0.19543912 | 0.20081486 | 0.18634527 | 0.65316545 | 0.95478493 | 1          | 0.88630176 | 0.88806314 |
| G1E_3    | 0.21187062 | 0.2181758  | 0.20996608 | 0.78818393 | 0.90579486 | 0.88630176 | 1          | 0.9488205  |
| G1E_4    | 0.19145014 | 0.19241206 | 0.17449626 | 0.73931716 | 0.88411235 | 0.88806314 | 0.9488205  | 1          |
