# Supplementary material for: Altered Chromatin Occupancy of Master Regulators Underlies Evolutionary Divergence in the Transcriptional Landscape of Erythroid Differentiation
Source: PubMed Central journal article supplement (PMC4270484; doi:10.1371/journal.pgen.1004890), 2014-12-18
Supplement: pgen.1004890.s019.pdf [file pgen.1004890.s019.pdf]

| Chromosome | Loci Start | Loci End  | Gene Symbol | Strand | GATA1, KLF1,<br>TAL1 peak |
|------------|------------|-----------|-------------|--------|---------------------------|
|            |            |           |             |        | distance to TSS           |
| chr13      | 41632680   | 41636735  | TRNA_Glu    | -      | 238                       |
| chr12      | 22198747   | 22202317  | CMAS        | +      | 1374                      |
| chr12      | 50440483   | 50446240  | ACCN2       | +      | -8125                     |
| chr12      | 56692622   | 56696794  | CS          | -      | -533                      |
| chr12      | 62652370   | 62656346  | USP15       | +      | 238                       |
| chr12      | 106694105  | 106697736 | TCP11L2     | +      | -660                      |
| chr12      | 114368766  | 114372864 | RBM19       | -      | 33361                     |
| chr11      | 907269     | 912881    | AP2A2       | +      | -15733                    |
| chr11      | 5244178    | 5249713   | HBB         | -      | 1356                      |
| chr11      | 5295386    | 5298551   | HBG2        | -      | 370043                    |
| chr11      | 5304753    | 5307936   | HBG2        | -      | 360667                    |
| chr11      | 10476289   | 10479151  | AMPD3       | +      | 5853                      |
| chr11      | 34458739   | 34462077  | CAT         | +      | -63                       |
| chr11      | 44597719   | 44605325  | CD82        | +      | 14382                     |
| chr11      | 61683721   | 61689056  | RAB3IL1     | -      | 1353                      |
| chr11      | 61727928   | 61742147  | FTH1        | -      | 95                        |
| chr11      | 65336112   | 65347994  | FAM89B      | +      | 2234                      |
| chr11      | 65402739   | 65406875  | SIPA1       | +      | -770                      |
| chr11      | 66681648   | 66683994  | PC          | -      | 43026                     |
| chr10      | 71991365   | 71994264  | PPA1        | -      | 376                       |
| chr10      | 104401322  | 104409280 | TRIM8       | +      | 1050                      |
| chr17      | 1632495    | 1634896   | WDR81       | +      | 13879                     |
| chr17      | 19911589   | 19915730  | SPECC1      | +      | 1011                      |
| chr17      | 29149812   | 29153461  | CRLF3       | -      | 142                       |
| chr17      | 40610201   | 40612727  | ATP6V0A1    | +      | 603                       |
| chr17      | 40849580   | 40852445  | CNTNAP1     | +      | 16381                     |
| chr17      | 42342228   | 42347879  | SLC4A1      | -      | 449                       |
| chr17      | 42356784   | 42362865  | SLC4A1      | -      | -14322                    |
| chr17      | 47324889   | 47328647  | FLJ40194    | +      | 1164                      |
| chr17      | 47815455   | 47819429  | FAM117A     | -      | 48495                     |
| chr17      | 71302746   | 71309525  | CDC42EP4    | -      | 2008                      |
| chr17      | 74377479   | 74383657  | SPHK1       | +      | 7827                      |
| chr17      | 75135006   | 75138612  | SCARNA16    | +      | 51421                     |
| chr17      | 76117392   | 76131118  | TMC6        | -      | 4233                      |
| chr16      | 154075     | 156349    | NPRL3       | -      | 33485                     |
| chr16      | 615265     | 621966    | NHLRC4      | +      | 1584                      |
| chr16      | 4849493    | 4855702   | ROGDI       | -      | 77                        |
| chr16      | 19531443   | 19534095  | GDE1        | -      | 681                       |
| chr16      | 56457222   | 56460596  | AMFR        | -      | 535                       |

|       |           |                       |   |        |
|-------|-----------|-----------------------|---|--------|
| chr16 | 67833392  | 67837965 RANBP10      | - | 4877   |
| chr16 | 67879388  | 67882390 NUTF2        | + | 71     |
| chr16 | 85403214  | 85413482 LOC727710    | - | -71346 |
| chr16 | 85585991  | 85593834 KIAA0182     | + | -55116 |
| chr16 | 88517364  | 88527254 ZFPM1        | + | 2296   |
| chr16 | 88556584  | 88559682 ZFPM1        | + | 38120  |
| chr16 | 88572993  | 88587310 ZFPM1        | + | 60138  |
| chr16 | 88587347  | 88594547 ZFPM1        | + | 70934  |
| chr16 | 89069305  | 89073292 CBFA2T3      | - | -27794 |
| chr15 | 40718486  | 40720665 IVD          | + | 21890  |
| chr15 | 43508881  | 43514635 EPB42        | - | 1565   |
| chr15 | 64123795  | 64127792 HERC1        | - | 354    |
| chr15 | 64441388  | 64447245 SNX22        | + | 401    |
| chr15 | 66096344  | 66098840 TRNA_Gln     | - | 63879  |
| chr15 | 66970906  | 66974277 BC016970     | + | 98064  |
| chr15 | 78555020  | 78559460 DNAJA4       | + | 754    |
| chr15 | 90756194  | 90757609 SEMA4B       | + | 28750  |
| chr14 | 37639959  | 37644515 LOC100129794 | + | 1007   |
| chr14 | 50807359  | 50811743 CDKL1        | - | 73628  |
| chr14 | 59653425  | 59657777 DAAM1        | + | 203    |
| chr14 | 65307110  | 65315282 SPTB         | - | 35405  |
| chr14 | 65344236  | 65348407 SPTB         | - | 280    |
| chr14 | 72946178  | 72948517 RGS6         | + | 548531 |
| chr14 | 102969605 | 102972304 TECPR2      | + | 141655 |
| chr19 | 1631522   | 1634386 TCF3          | - | 19374  |
| chr19 | 5798135   | 5800719 DUS3L         | - | -8178  |
| chr19 | 10395282  | 10407435 ICAM5        | + | 704    |
| chr19 | 10653159  | 10656061 ATG4D        | + | -36    |
| chr19 | 11491102  | 11496514 EPOR         | - | 1210   |
| chr19 | 12910128  | 12914113 PRDX2        | - | 574    |
| chr19 | 12993965  | 13000544 KLF1         | - | 763    |
| chr19 | 13055217  | 13060994 RAD23A       | + | 1452   |
| chr19 | 34744796  | 34747143 KIAA0355     | + | 514    |
| chr19 | 40968776  | 40973470 BLVRB        | - | 602    |
| chr19 | 47743905  | 47748722 CCDC9        | + | -13417 |
| chr19 | 49374512  | 49383216 PPP1R15A     | + | 3216   |
| chr18 | 43731737  | 43734674 C18orf25     | + | -20782 |
| chr18 | 55249616  | 55257866 FECH         | - | 228    |
| chrX  | 134653963 | 134657421 DDX26B      | + | 1138   |
| chr22 | 19919421  | 19924049 TXNRD2       | - | 7624   |
| chr22 | 39539386  | 39543581 CBX7         | - | 7055   |
| chr20 | 3746561   | 3750083 C20orf27      | - | 130    |
| chr20 | 17549459  | 17552515 DSTN         | + | 389    |

|       |           |           |          |   |        |
|-------|-----------|-----------|----------|---|--------|
| chr20 | 25034489  | 25041165  | ACSS1    | - | 991    |
| chr20 | 30261081  | 30267614  | BCL2L1   | - | 46309  |
| chr20 | 30793111  | 30796958  | PLAGL2   | - | 512    |
| chr21 | 34567881  | 34573764  | C21orf54 | - | -28281 |
| chr7  | 1093718   | 1096584   | GPR146   | + | 207    |
| chr7  | 100129726 | 100133901 | AGFG2    | + | -5020  |
| chr7  | 100489776 | 100496433 | ACHE     | - | 611    |
| chr7  | 129597419 | 129600024 | JA611275 | + | 4122   |
| chr7  | 138774725 | 138778437 | ZC3HAV1  | - | 17884  |
| chr7  | 155086689 | 155092044 | INSIG1   | + | -119   |
| chr6  | 30127458  | 30131215  | TRIM10   | - | -625   |
| chr6  | 37069440  | 37073210  | PIM1     | + | -66596 |
| chr6  | 37076548  | 37079338  | PIM1     | + | -59978 |
| chr6  | 37633991  | 37636429  | MDGA1    | - | 30556  |
| chr6  | 43594460  | 43600365  | MAD2L1BP | + | 134    |
| chr6  | 52931630  | 52934269  | FBXO9    | + | 3154   |
| chr5  | 67660714  | 67665145  | PIK3R1   | + | 151346 |
| chr5  | 102593800 | 102597284 | C5orf30  | + | 1101   |
| chr5  | 153575638 | 153581078 | GALNT10  | + | 8064   |
| chr5  | 176851976 | 176856959 | GRK6     | + | 781    |
| chr5  | 179226418 | 179235055 | SQSTM1   | + | -2651  |
| chr4  | 2844066   | 2847833   | ADD1     | + | 366    |
| chr4  | 56914398  | 56917049  | CEP135   | + | 100687 |
| chr4  | 90756228  | 90759997  | SNCA     | - | 1335   |
| chr4  | 145057858 | 145064765 | GYPA     | - | 593    |
| chr4  | 153855715 | 153860325 | BC039551 | - | -31    |
| chr4  | 185664316 | 185670149 | ACSL1    | - | 79983  |
| chr3  | 16378338  | 16381526  | RFTN1    | - | 175290 |
| chr3  | 49393147  | 49397963  | GPX1     | - | 236    |
| chr3  | 49708018  | 49714909  | APEH     | + | 29     |
| chr3  | 49839419  | 49845906  | UBA7     | - | 8729   |
| chr3  | 50269424  | 50277341  | GNAI2    | + | 9659   |
| chr3  | 50328268  | 50331629  | IFRD2    | - | 401    |
| chr3  | 98311202  | 98314270  | CPOX     | - | -281   |
| chr3  | 183732807 | 183738233 | ABCC5    | - | 207    |
| chr3  | 195918563 | 195924786 | ZDHHC19  | - | 16626  |
| chr2  | 113440483 | 113445370 | SLC20A1  | + | 39493  |
| chr2  | 178127696 | 178132016 | NFE2L2   | - | 127563 |
| chr2  | 190442836 | 190450899 | SLC40A1  | - | -1330  |
| chr2  | 220081615 | 220085542 | ABCB6    | - | 1596   |
| chr2  | 220141947 | 220145651 | DNAJB2   | + | -240   |
| chr2  | 228315199 | 228317825 | AGFG1    | + | -20375 |
| chr1  | 15735301  | 15739864  | EFHD2    | + | 1192   |

|      |           |           |           |   |        |
|------|-----------|-----------|-----------|---|--------|
| chr1 | 25737610  | 25742104  | RHCE      | - | 16826  |
| chr1 | 25745417  | 25748799  | RHCE      | - | 9575   |
| chr1 | 26867583  | 26873461  | RPS6KA1   | + | 14274  |
| chr1 | 29208034  | 29215385  | EPB41     | + | -1893  |
| chr1 | 44494724  | 44499056  | SLC6A9    | - | 244    |
| chr1 | 44499083  | 44503673  | KLF17     | + | -12651 |
| chr1 | 45475202  | 45481141  | UROD      | + | 367    |
| chr1 | 47644074  | 47649162  | PDZK1IP1  | - | 9153   |
| chr1 | 114455078 | 114461613 | DCLRE1B   | + | 10431  |
| chr1 | 116974087 | 116977208 | ATP1A1OS  | - | -14403 |
| chr1 | 118146873 | 118159122 | FAM46C    | + | 4394   |
| chr1 | 203258231 | 203260577 | LOC730227 | - | 15049  |
| chr1 | 203271762 | 203277004 | LOC730227 | - | 70     |
| chr1 | 205223982 | 205226731 | TMCC2     | + | 28319  |
| chr1 | 220079246 | 220082187 | SLC30A10  | - | 51273  |
| chr1 | 224689731 | 224692981 | AB586698  | - | -85273 |
| chr1 | 225612234 | 225617276 | LBR       | - | 1802   |
| chr1 | 226185358 | 226189261 | C1orf55   | - | -243   |
| chr1 | 247093871 | 247096543 | AHCTF1    | - | -481   |
| chr1 | 248017162 | 248023067 | TRIM58    | + | -386   |
| chr9 | 37902679  | 37906148  | BC021061  | - | 7725   |
| chr9 | 92217635  | 92223022  | GADD45G   | + | 402    |
| chr9 | 100263098 | 100268024 | TMOD1     | + | 2100   |
| chr9 | 125093351 | 125096346 | MRRF      | + | 67967  |
| chr9 | 127043964 | 127046435 | NEK6      | + | 25315  |
| chr8 | 20090833  | 20094377  | LZTS1     | - | 20198  |
| chr8 | 110373703 | 110376501 | PKHD1L1   | + | 397    |
| chr8 | 125482697 | 125489252 | CR933665  | - | 830    |
| chr8 | 142316694 | 142319863 | LOC731779 | + | -32369 |
