# Supplementary material for: Altered Chromatin Occupancy of Master Regulators Underlies Evolutionary Divergence in the Transcriptional Landscape of Erythroid Differentiation
Source: PubMed Central journal article supplement (PMC4270484; doi:10.1371/journal.pgen.1004890), 2014-12-18
Supplement: pgen.1004890.s020.pdf [file pgen.1004890.s020.pdf]

| state | H3K36me3* | H3K4me1* | H3K4me2* | H3K4me3* | H3K9ac* | H3K27me3* |
|-------|-----------|----------|----------|----------|---------|-----------|
| 1     | 0.74      | 0.02     | 0.00     | 0.00     | 0.00    | 0.00      |
| 2     | 0.04      | 0.01     | 0.00     | 0.00     | 0.00    | 0.00      |
| 3     | 0.92      | 0.82     | 0.02     | 0.00     | 0.01    | 0.00      |
| 4     | 0.94      | 0.98     | 0.93     | 0.36     | 0.33    | 0.01      |
| 5     | 0.04      | 0.96     | 0.74     | 0.17     | 0.20    | 0.01      |
| 6     | 0.02      | 0.27     | 0.18     | 0.03     | 0.12    | 0.00      |
| 7     | 0.03      | 0.70     | 0.00     | 0.01     | 0.01    | 0.01      |
| 8     | 0.05      | 0.96     | 1.00     | 0.93     | 0.76    | 0.04      |
| 9     | 0.01      | 0.17     | 0.63     | 0.61     | 0.08    | 0.02      |
| 10    | 0.04      | 0.05     | 0.96     | 0.89     | 0.93    | 0.00      |
| 11    | 0.00      | 0.04     | 0.72     | 1.00     | 0.94    | 0.03      |
| 12    | 0.03      | 0.44     | 0.65     | 0.45     | 0.08    | 0.93      |
| 13    | 0.00      | 0.00     | 0.00     | 0.00     | 0.00    | 0.07      |
| 14    | 0.00      | 0.00     | 0.00     | 0.00     | 0.00    | 0.68      |
| 15    | 0.00      | 0.00     | 0.00     | 0.00     | 0.00    | 0.00      |

\*observation frequency

| state | Genome % | CpG Island* | Exons* | Gene body* | TES*  | TSS*  | Promoter* | Lamin B1* |
|-------|----------|-------------|--------|------------|-------|-------|-----------|-----------|
| 1     | 0.06     | 0.97        | 10.62  | 2.38       | 4.72  | 0.98  | 0.75      | 0.28      |
| 2     | 10.19    | 0.40        | 2.91   | 2.12       | 2.73  | 0.41  | 0.94      | 0.31      |
| 3     | 0.00     | 0.00        | 10.28  | 2.20       | 0.00  | 0.00  | 0.85      | 0.42      |
| 4     | 0.00     | 0.00        | 3.24   | 1.02       | 14.88 | 0.00  | 3.20      | 0.39      |
| 5     | 0.03     | 0.83        | 2.38   | 1.80       | 2.07  | 1.45  | 3.11      | 0.25      |
| 6     | 0.99     | 0.70        | 1.80   | 1.69       | 2.48  | 1.57  | 4.30      | 0.35      |
| 7     | 0.20     | 0.14        | 1.69   | 1.87       | 2.04  | 1.05  | 1.11      | 0.39      |
| 8     | 0.01     | 7.63        | 4.15   | 1.85       | 7.70  | 6.54  | 15.64     | 0.10      |
| 9     | 0.35     | 12.90       | 3.56   | 1.65       | 3.56  | 19.07 | 21.48     | 0.29      |
| 10    | 0.08     | 31.77       | 6.70   | 1.75       | 5.92  | 33.56 | 17.95     | 0.15      |
| 11    | 0.55     | 59.80       | 8.92   | 1.83       | 3.28  | 63.40 | 28.99     | 0.21      |
| 12    | 0.24     | 78.71       | 8.78   | 1.43       | 2.97  | 43.42 | 20.63     | 0.45      |
| 13    | 20.82    | 0.30        | 0.90   | 0.92       | 1.14  | 0.53  | 0.88      | 1.02      |
| 14    | 5.78     | 4.51        | 2.13   | 1.12       | 1.86  | 2.63  | 3.34      | 0.64      |
| 15    | 60.71    | 0.07        | 0.45   | 0.80       | 0.50  | 0.22  | 0.30      | 1.17      |

\* fold enrichment
