# Supplementary material for: Altered Chromatin Occupancy of Master Regulators Underlies Evolutionary Divergence in the Transcriptional Landscape of Erythroid Differentiation
Source: PubMed Central journal article supplement (PMC4270484; doi:10.1371/journal.pgen.1004890), 2014-12-18
Supplement: pgen.1004890.s021.pdf [file pgen.1004890.s021.pdf]

Model learned on each species independently

| mouse | $R^2$ | human  | $R^2$ |
|-------|-------|--------|-------|
| ProE  | 0.62  | ProE   | 0.56  |
| BasoE | 0.57  | eBasoE | 0.56  |
| PolyE | 0.56  | lBasoE | 0.55  |
| OrthE | 0.54  | PolyE  | 0.47  |
|       |       | OrthE  | 0.39  |

Model learned on both species together

| mouse | $R^2$ | human  | $R^2$ |
|-------|-------|--------|-------|
| ProE  | 0.61  | ProE   | 0.57  |
| BasoE | 0.57  | eBasoE | 0.56  |
| PolyE | 0.56  | lBasoE | 0.55  |
| OrthE | 0.53  | PolyE  | 0.47  |
|       |       | OrthE  | 0.40  |
